# Supplementary material for: Optical Singularity Protractor for Rotating Metrology with Neuromorphic Sensing
Source: Research Square preprint supplement (doi:10.21203/rs.3.rs-7544738/v1), 2025-09-19
Supplement: Supplementary file 1 [file 53738842a30b1f8eb87415c4.docx]

**Supplementary Information for**

**Optical Singularity Protractor for Rotating Metrology with Neuromorphic Sensing**

Zhe Weng,1, 2 Yiyu Zhao,1, 2 Zhiming Qing,1, 2 Zhi-Cheng Ren,1, 2 Wenxiang Yan,1, 2 Xi-Lin Wang,1, 2 Jianping Ding1, 2, 3, * and Hui-Tian Wang1, 2, *

1 National Laboratory of Solid State Microstructures and School of Physics, Nanjing University, Nanjing 210093, China.

### 2 Collaborative Innovation Center of Advanced Microstructures, Nanjing University, Nanjing 210093, China.

### 3 Collaborative Innovation Center of Solid-State Lighting and Energy-Saving Electronics, Nanjing University, Nanjing 210093, China.

### * Corresponding author: jpding@nju.edu.cn; htwang@nju.edu.cn

### **Supplementary Note:**

### **1. Rotation of structured light and the Doppler effect;**

### **2. Trailing artifacts of NeCam;**

### **Supplementary Reference.**

**Supplementary Note 1 – Rotation of structured light and the Doppler effect.**

For an optical vortex beam carrying topological charge , its expression is given by:

(S1)

where  represents the amplitude with azimuthal symmetry,  denotes the wave vector, and  is the angular frequency with  being the speed of light. When the beam undergoes rotation  and translation  relative to the detector, the received signal becomes1-3:

. (S2)

This indicates that the signal is modulated by a time-varying phase, introducing additional optical path differences. The frequency shift manifests as phase variations, requiring interferometric detection with a reference plane wave . The interference intensity is:

. (S3)

For simplicity, radial modulation terms are omitted here. In practice, this interference occurs predominantly on the vortex ring where  maximizes the interference contrast. The beat frequency extracted at this radius gives the Doppler shift :

. (S4)

This shift combines rotational and linear Doppler effects in a heterodyne configuration. For common-path interference using composite vortex beams with topological charges  and :

(S5)

yielding a pure rotational Doppler shift:

. (S6)

Compared to heterodyne interference, the use of composite vortex beams offers the advantage of canceling out the linear Doppler effect, such that the interference frequency shift arises purely from the rotational Doppler effect. As a special case, when the composite vortex beam consists of two beams with opposite topological charges *m*, the resulting Doppler shift becomes .

While Eq. (S5) neglects radial dependence, we now derive the influence of radial variation on the interference intensity. The intensity distribution serves as the coefficient for both direct current and alternating current terms, affecting the interference contrast . Taking LG beams as an example4, the amplitude of a vortex beam carrying only topological charge *m* (with mode index ) at *z=0* is given by:

(S7)

where *w0* is the waist radius of the light beam. Substituting into the contrast expression yields:

(S8)

This function reaches maximum contrast at when:

(S9)

For composite vortex beams with positive and , perfect interference occurs precisely at this radius, which coincides with the position of off-axis singularities. Moreover, the cleanest frequency spectrum for rotational Doppler shift extraction is obtained at this singularity ring. Fig. S1 presents the interference contrast for different topological charges. Beyond the peak value, the width of the contrast peak also plays a role, reflecting the intensity gradient near the singularities. In our experiments, we selected and to generate composite vortex beams, achieving optimal singularity centroid formation. Furthermore, by engineering perfect vortex beams through modulation, sharper singularity centroids can be obtained without altering their vortex characteristics.


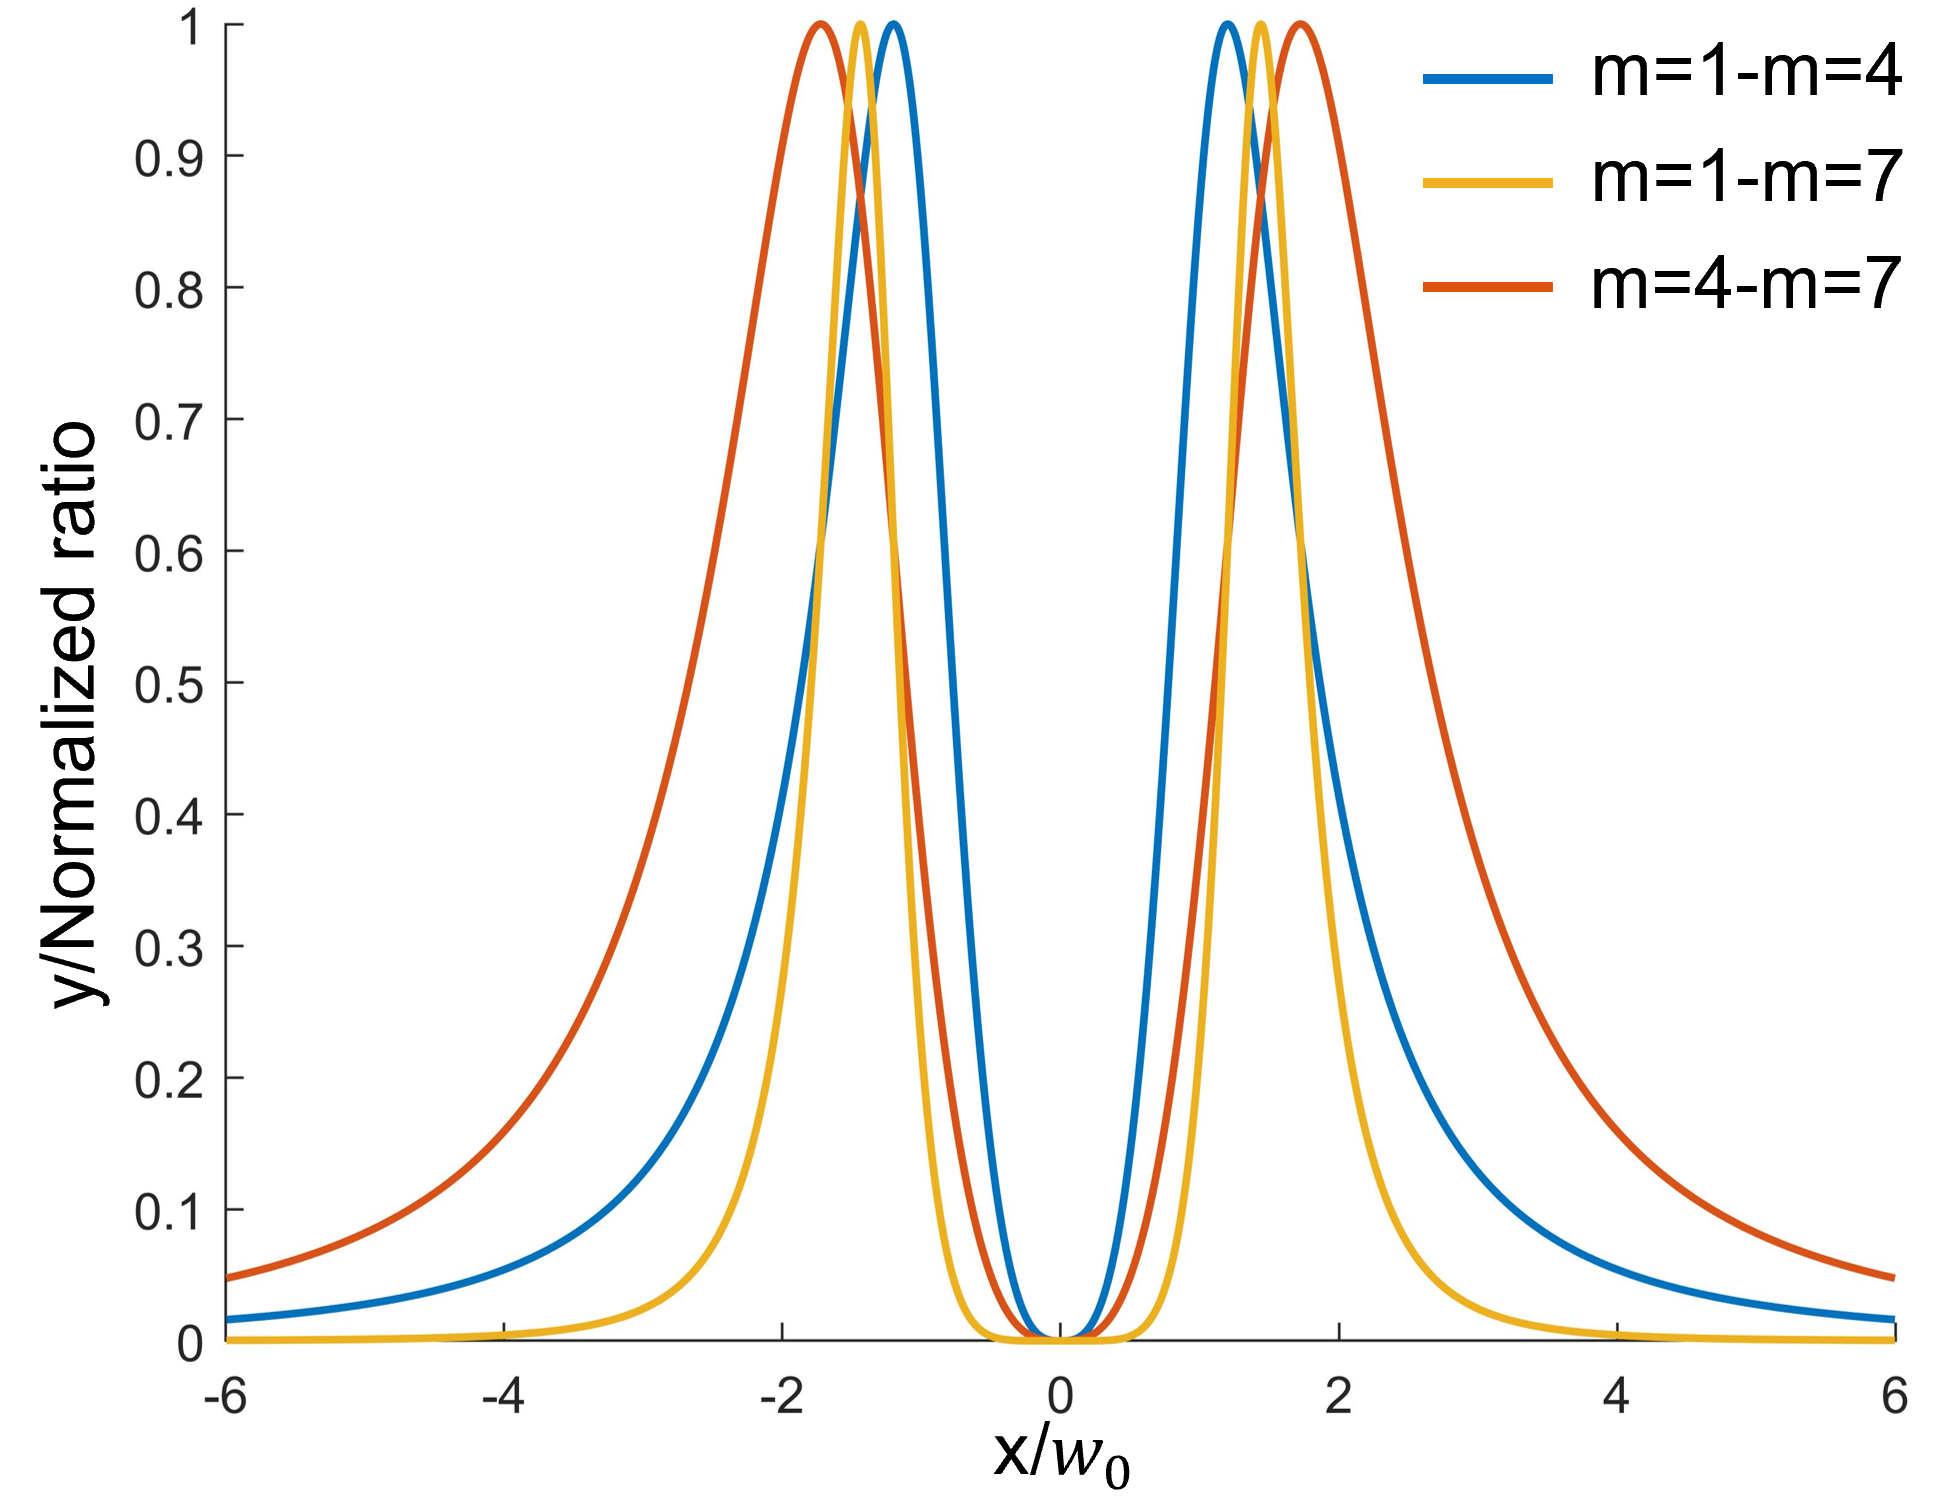


**Fig. S1:** **Interference contrast of composite vortex beams carrying different topological charges.** The x-axis in units of and the y-axis showing normalized ratio.

**Supplementary Note 2 – Trailing artifacts of NeCam.**

Trailing artifacts are a common phenomenon in array-based photodetectors. In NeCam, this effect is light-intensity dependent and primarily occurs in low-light environments5, exhibiting characteristics consistent with a resistance-capacitance low-pass filter model6. While this potential factor could affect the performance of OSinP, our experiments have not reached the hardware's operational limits. Fig. S2 presents event responses at different rotation velocities, with data originating from Fig. 3 in the main text. As rotation velocity increases, the polarity event responses from singularities gradually grow until reaching saturation, with notable trailing artifacts observed in positive polarity events. These trailing events may become aliased with genuine signals during rotation sensing, potentially affecting the signal-to-noise ratio. In our main experiments, the singularity localization and angle calculation methods overcome this effect, while light intensity adjustment also provides some mitigation. As seen in Fig. S2c, the trailing artifacts do not scale proportionally with rotation velocity but rather result from combined factors including illumination conditions, hardware response delay, and data transmission speed. In principle, the topological charge map of composite vortex beams also influences trailing artifacts, as the topological charge affects both singularity size/spacing and Doppler shift magnitude.


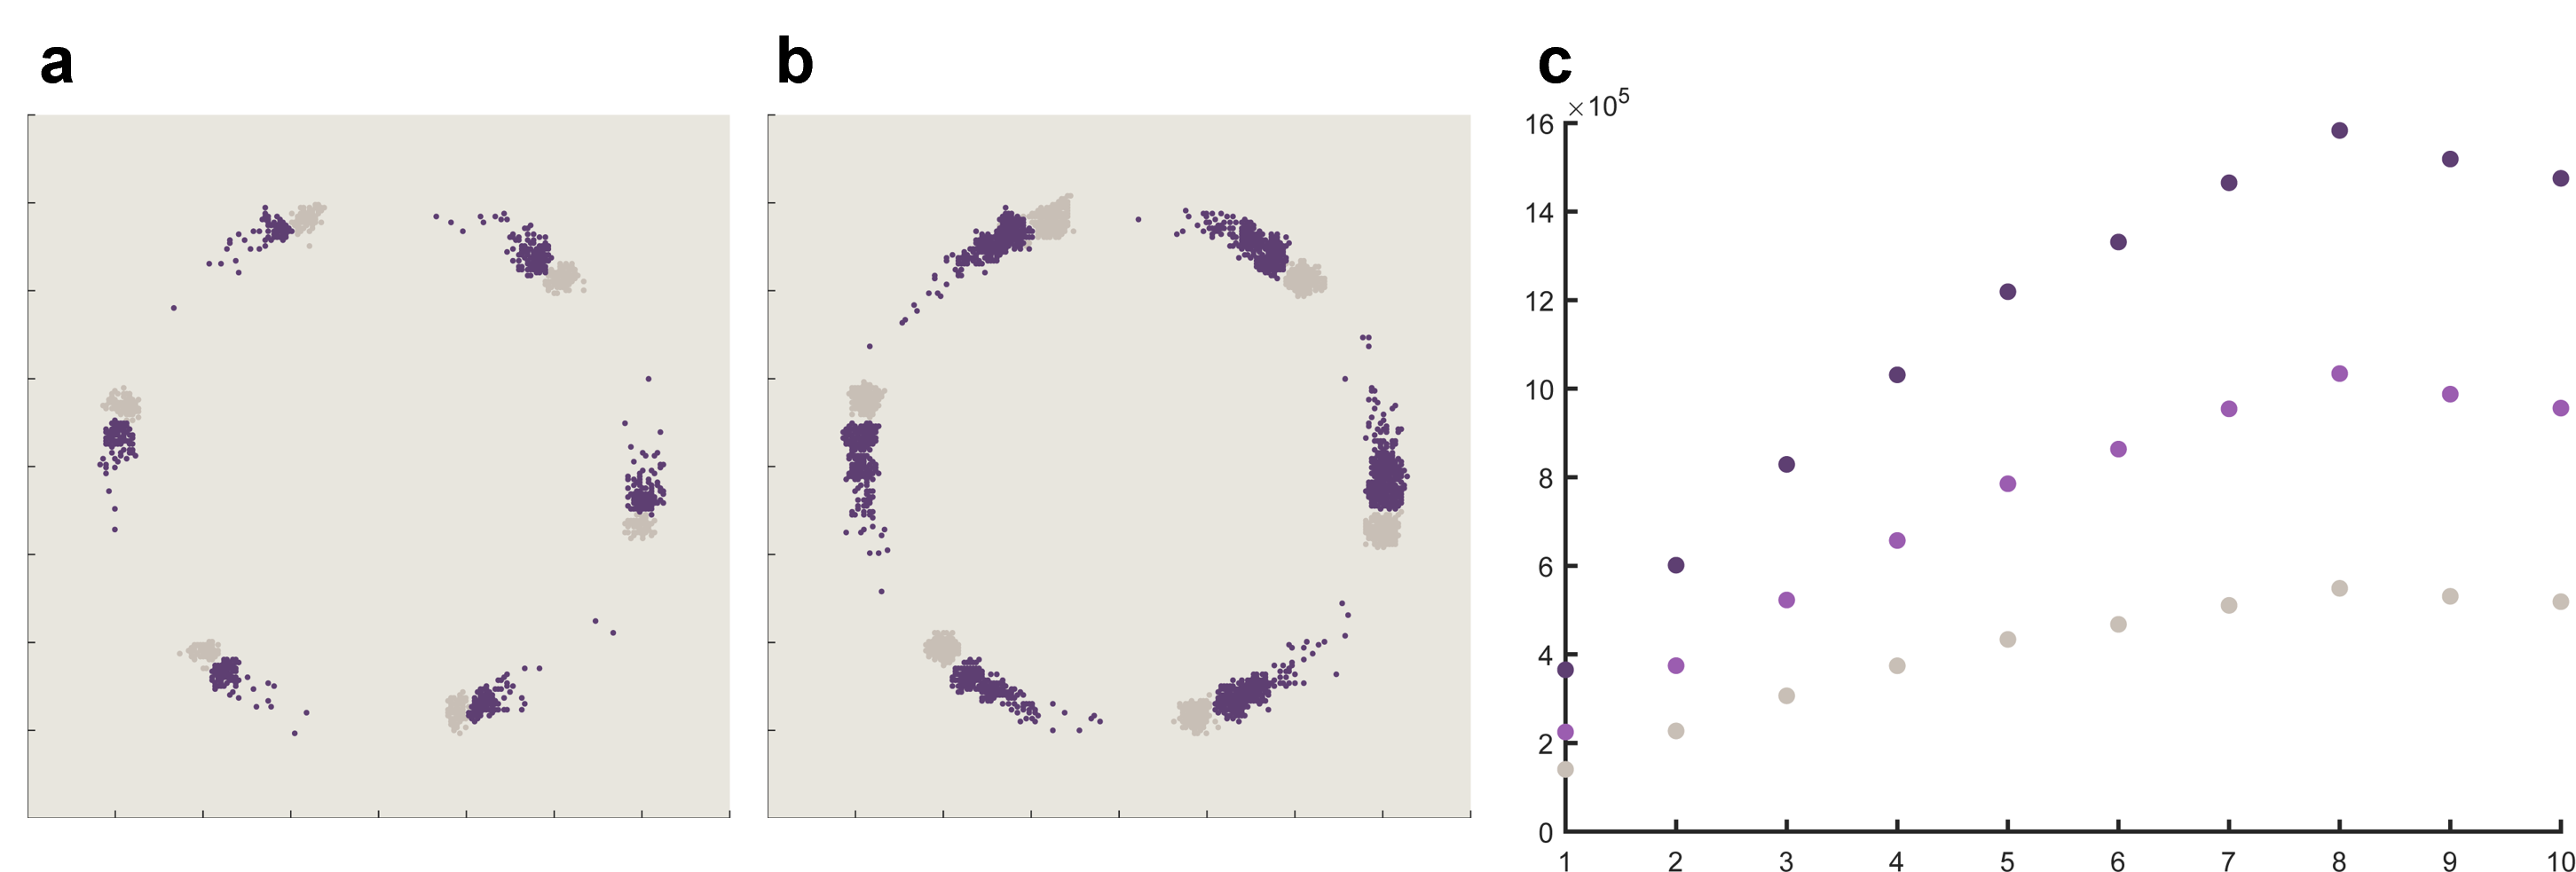


**Fig. S2:** **Trailing artifacts in NeCam responses. a** Event polarity responses at low rotation velocity. **b** Event polarity responses at high rotation velocity, showing trailing artifacts of positive polarity events. **c** Increased event responses with rising rotation speed, where the proportion of trailing positive-polarity events grows until reaching saturation.

**Supplementary References**

1. Courtial, J. et al. Measurement of the Rotational Frequency Shift Imparted to a Rotating Light Beam Possessing Orbital Angular Momentum. *Phys. Rev. Lett.* **80**, 3217–3219 (1998).

2. Courtial, J. et al. Rotational Frequency Shift of a Light Beam. *Phys. Rev. Lett.* **81**, 4828–4830 (1998).

3. Fang, L., Padgett, M.J. & Wang, J. Sharing a Common Origin Between the Rotational and Linear Doppler Effects. *Laser Photonics Rev.* **11**, 1700183 (2017).

4. Tang, A. et al. Completely revealing the amplitude properties of Laguerre-Gaussian vortex beams. *Opt. Express* **30**, 28892–28904 (2022).

5. Zhang, Z. et al. From Sim-to-Real: Toward General Event-based Low-light Frame Interpolation with Per-scene Optimization. In: *SIGGRAPH Asia 2024 Conference Papers*). Association for Computing Machinery (2024).

6. Liu, H. et al. Seeing Motion at Nighttime with an Event Camera. In: *2024 IEEE/CVF Conference on Computer Vision and Pattern Recognition (CVPR)*) (2024).
